# Supplementary material for: C5 and SRGAP3 Polymorphisms Are Linked to Paediatric Allergic Asthma in the Italian Population
Source: MDPI journal article supplement (doi:10.3390/genes13020214), 2022-01-25

## Supplementary Figures and Tables

**Table S1.** Comparison of SNPs allele frequencies in RC group (n=171 - cases) and CTRL (n=773). (*dbSNP*: variant identifier; *A1*: effect allele; *F\_A*: frequency among cases; *F\_U*: frequency among controls; *A2*: non-effect allele; *CHISQ*: allelic test chi-square statistic; *P*: allelic p-value; *OR*: odds (allele 1 | cases)/odds (allele 1 | controls)). No significant association (nominal p-values) was detected.

| dbSNP             | Gene   | A1  | F_A   | F_U   | A2  | CHISQ | P    | OR   |
|-------------------|--------|-----|-------|-------|-----|-------|------|------|
| <b>rs10754593</b> | RYR2   | "G" | 0.401 | 0.395 | "C" | 0.04  | 0.84 | 1.03 |
| <b>rs1162394</b>  | SRGAP3 | "C" | 0.430 | 0.398 | "G" | 1.19  | 0.20 | 1.14 |
| <b>rs694936</b>   | NFKBIZ | "T" | 0.456 | 0.436 | "A" | 0.46  | 0.50 | 1.09 |
| <b>rs1456114</b>  | PTPLB  | "G" | 0.322 | 0.345 | "A" | 0.67  | 0.41 | 0.90 |
| <b>rs4580655</b>  | TACR3  | "G" | 0.383 | 0.391 | "A" | 0.069 | 0.79 | 0.97 |
| <b>rs456290</b>   | SGCD   | "C" | 0.140 | 0.158 | "T" | 0.65  | 0.42 | 0.87 |
| <b>rs3250</b>     | TMEM14 | "C" | 0.439 | 0.450 | "T" | 0.15  | 0.70 | 0.95 |
| <b>rs531003</b>   | LPAR1  | "C" | 0.269 | 0.263 | "G" | 0.06  | 0.81 | 1.03 |
| <b>rs25681</b>    | C5     | "T" | 0.447 | 0.437 | "C" | 0.13  | 0.72 | 1.05 |
| <b>rs10760153</b> | RAB14  | "C" | 0.439 | 0.452 | "T" | 0.19  | 0.66 | 0.95 |
| <b>rs12820238</b> | EPYC   | "T" | 0.155 | 0.148 | "G" | 0.12  | 0.72 | 1.06 |

**Table S2:** Comparison of SNPs allele frequencies in allergic group (n=279 - cases) and CTRL (n=773); *A1*: effect allele; *F\_A*: frequency among cases; *F\_U*: frequency among controls; *A2*: non-effect allele; *CHISQ*: allelic test chi-square statistic; *P*: allelic p-value; *OR*: odds (allele 1 | cases)/odds (allele 1 | controls)). Significant associations (nominal p-values) are highlighted in bold.

| dbSNP             | Gene          | A1  | F_A          | F_U          | A2  | CHISQ       | P            | OR          |
|-------------------|---------------|-----|--------------|--------------|-----|-------------|--------------|-------------|
| <b>rs10754593</b> | RYR2          | "G" | 0.403        | 0.395        | "C" | 0.13        | 0.72         | 1.04        |
| <b>rs1162394</b>  | <b>SRGAP3</b> | "C" | <b>0.450</b> | <b>0.398</b> | "G" | <b>4.58</b> | <b>0.032</b> | <b>1.24</b> |
| <b>rs694936</b>   | NFKBIZ        | "T" | 0.450        | 0.436        | "A" | 0.32        | 0.57         | 1.06        |
| <b>rs1456114</b>  | PTPLB         | "G" | 0.321        | 0.345        | "A" | 1.05        | 0.31         | 0.90        |
| <b>rs4580655</b>  | TACR3         | "G" | 0.389        | 0.391        | "A" | 0.0056      | 0.94         | 0.99        |
| <b>rs456290</b>   | SGCD          | "C" | 0.142        | 0.157        | "T" | 0.83        | 0.36         | 0.88        |
| <b>rs3250</b>     | TMEM14        | "C" | 0.446        | 0.450        | "T" | 0.026       | 0.87         | 0.98        |
| <b>rs531003</b>   | LPAR1         | "C" | 0.274        | 0.263        | "G" | 0.28        | 0.60         | 1.06        |
| <b>rs25681</b>    | C5            | "T" | 0.471        | 0.437        | "C" | 2.00        | 0.16         | 1.15        |
| <b>rs10760153</b> | RAB14         | "C" | 0.462        | 0.452        | "T" | 0.20        | 0.66         | 1.05        |
| <b>rs12820238</b> | EPYC          | "T" | 0.167        | 0.148        | "G" | 1.17        | 0.28         | 1.16        |

**Figure S1:** Allelic discrimination plots resulting from the SNP genotyping assay for the 11 analysed SNPs.

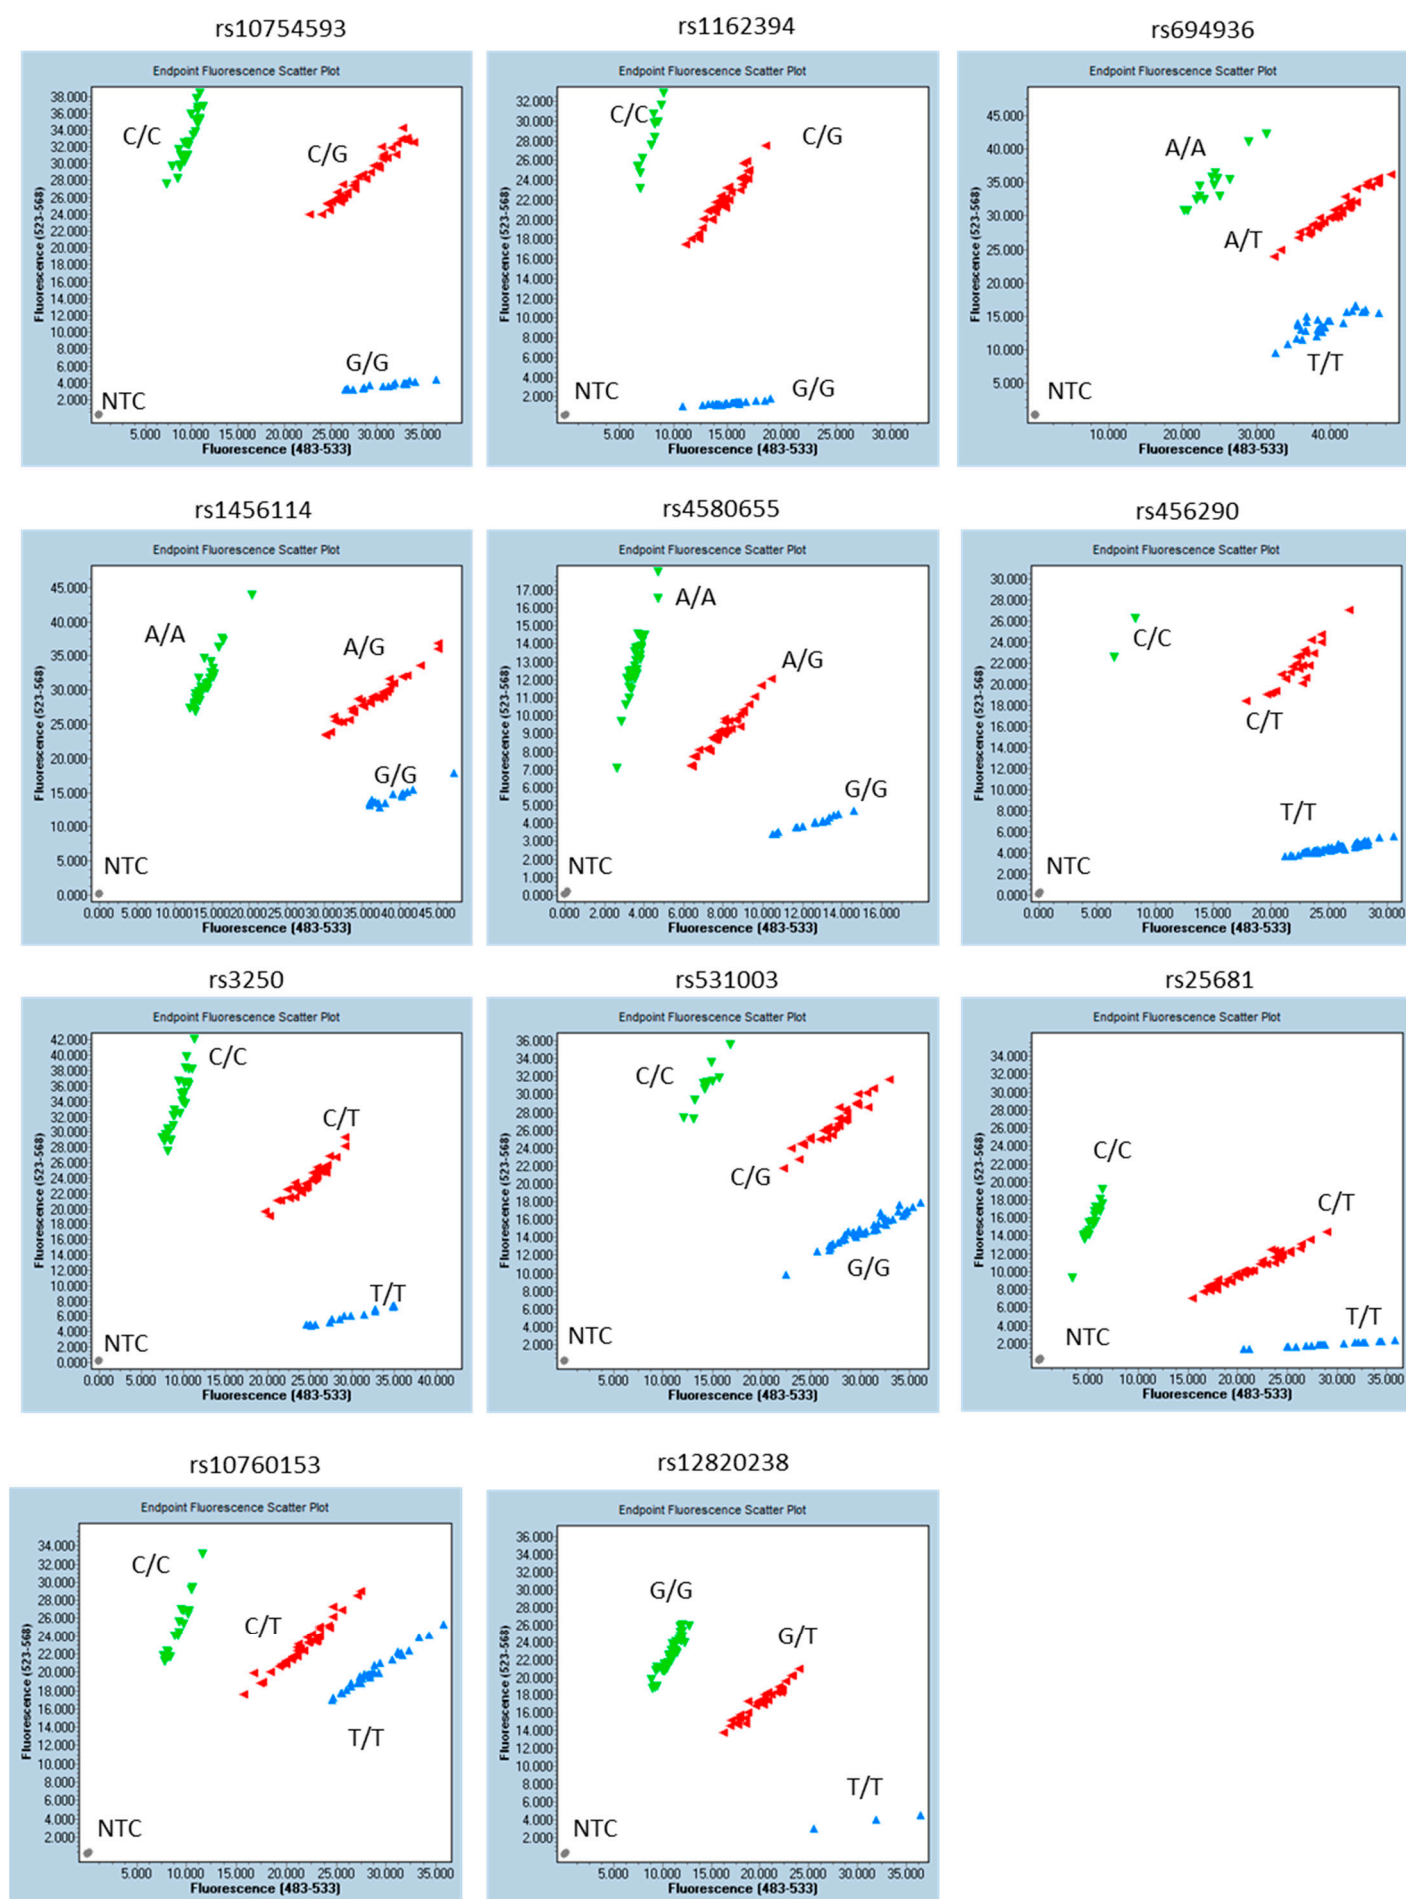

**Figure S2.** Representation of the allelic distribution for the rs25681 SNP in C5 gene in the four Italian macro-areas (*N\_ITA*=northern Italy, *C\_ITA*=central Italy, *S\_ITA*=southern Italy, *SARD*=Sardinia).

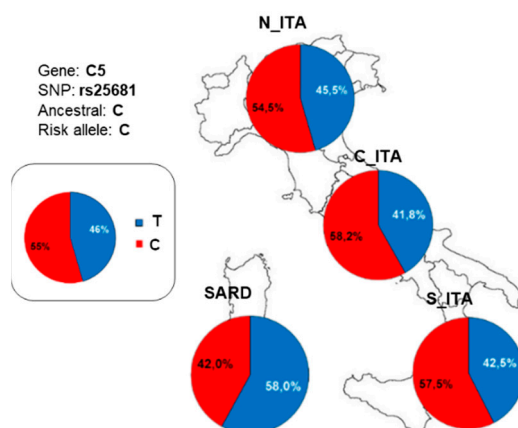

Supplement: s1 [file s1]
